# Supplementary material for: The Ty1 Retrotransposon Restriction Factor p22 Targets Gag
Source: PubMed Central journal article supplement (PMC4599808; doi:10.1371/journal.pgen.1005571), 2015-10-09
Supplement: pgen.1005571.s001.pdf [file pgen.1005571.s001.pdf]

**S1 Table. Yeast Strains.**

| Strain | Relevant Genotype                                                                                    | Genomic Ty1s                         | Source     |
|--------|------------------------------------------------------------------------------------------------------|--------------------------------------|------------|
| YEM514 | <i>MAT<math>\alpha</math>, his3-<math>\Delta</math>200hisG, ura3, spt3-<math>\Delta</math>KanMX4</i> | Ty1-less, +1 Ty1-4253his3- <i>AI</i> | (1)        |
| YEM570 | YEM514                                                                                               | +7 Ty1                               | E. Matsuda |
| YEM568 | YEM514                                                                                               | +14 Ty1                              | E. Matsuda |
| YEM572 | YEM514                                                                                               | +21 Ty1                              | E. Matsuda |
| YEM515 | YEM514                                                                                               | +37 Ty1                              | (1)        |
| DG3582 | <i>MAT<math>\alpha</math>, his3-<math>\Delta</math>200hisG, ura3, trp1</i>                           | Ty1-less                             | (2)        |
| DG3710 | DG3582                                                                                               | +2 Ty1his3- <i>AI</i>                | This study |
| DG3716 | DG3582                                                                                               | +2 Ty1his3- <i>AI-N183D</i>          | This study |
| DG3713 | DG3582                                                                                               | +1 Ty1his3- <i>AI</i>                | This study |
| DG3725 | DG3582                                                                                               | +1 Ty1his3- <i>AI-K186Q</i>          | This study |
| DG3719 | DG3582                                                                                               | +1 Ty1his3- <i>AI-A273V</i>          | This study |
| DG3722 | DG3582                                                                                               | +1 Ty1his3- <i>AI-I201T</i>          | This study |
| DG2533 | <i>MAT<math>\alpha</math>, his3-<math>\Delta</math>200hisG, ura3</i>                                 | Ty1-less, +1 Ty1-4253his3- <i>AI</i> | (3)        |
| YEM13  | DG2533                                                                                               | +14 Ty1                              | E. Matsuda |
| YEM14  | DG2533                                                                                               | +21 Ty1                              | E. Matsuda |
| JM487  | DG2533                                                                                               | +18 Ty1- <i>K186Q</i>                | This study |
| JM506  | DG2533                                                                                               | +20 Ty1- <i>K186Q</i>                | This study |
| JM484  | DG2533                                                                                               | +14 Ty1- <i>I201T</i>                | This study |
| JM503  | DG2533                                                                                               | +19 Ty1- <i>I201T</i>                | This study |
| DG3508 | DG3582, <i>spt3-<math>\Delta</math>KanMX4</i>                                                        | Ty1-less                             | This study |
| DG3664 | DG3582                                                                                               | Ty2-917his3- <i>AI</i>               | This study |
| DG2196 | <i>MAT<math>\alpha</math>, his3-<math>\Delta</math>200hisG, ura3, trp1</i>                           | Ty1-less, +1 Ty1his3- <i>AI(96)</i>  | (4)        |

## Supplemental References for Strains

1. Matsuda E, Garfinkel DJ. Posttranslational interference of Ty1 retrotransposition by antisense RNAs. *Proc Natl Acad Sci U S A*. 2009;106(37):15657-62.
2. Saha A, Mitchell JA, Nishida Y, Hildreth JE, Ariberre JA, Gilbert WV, et al. A trans-Dominant Form of Gag Restricts Ty1 Retrotransposition and Mediates Copy Number Control. *J Virol*. 2015;89(7):3922-38.
3. Garfinkel D. Genome evolution mediated by Ty elements in *Saccharomyces*. *Cytogenet Genome Res*. 2005;110(1-4):63-9.
4. Garfinkel DJ, Nyswaner K, Wang J, Cho J-Y. Post-transcriptional cosuppression of Ty1 retrotransposition. *Genetics*. 2003;165(1):83-99.
