# Supplementary material for: The Ty1 Retrotransposon Restriction Factor p22 Targets Gag
Source: PubMed Central journal article supplement (PMC4599808; doi:10.1371/journal.pgen.1005571), 2015-10-09
Supplement: pgen.1005571.s002.pdf [file pgen.1005571.s002.pdf]

**S2 Table. CNC-resistant mutations.**

| <b>Amino acid change</b> | <b>Mutagenesis</b>       |
|--------------------------|--------------------------|
| Gag T55A Q351L           | PCR-based ( <i>GAG</i> ) |
| Gag P173L                | XL-1 Red                 |
| Gag M174I R362G          | PCR-based ( <i>GAG</i> ) |
| Gag D180N                | XL-1 Red                 |
| Gag N183D                | XL-1 Red                 |
| Gag K186Q                | XL-1 Red                 |
| Gag I189V S411G/ PR S10G | PCR-based ( <i>GAG</i> ) |
| Gag I201T                | XL-1 Red                 |
| Gag T218A                | XL-1 Red                 |
| Gag T218I                | XL-1 Red                 |
| Gag K250E                | PCR-based ( <i>GAG</i> ) |
| Gag A273V                | XL-1 Red                 |
| Gag E287T                | XL-1 Red and PCR-        |
| Gag V336I                | PCR-based ( <i>GAG</i> ) |
| Gag Q350R S395L          | PCR-based ( <i>GAG</i> ) |
| RT D518G/V519A           | PCR-based ( <i>POL</i> ) |
