# Supplementary material for: The Ty1 Retrotransposon Restriction Factor p22 Targets Gag
Source: PubMed Central journal article supplement (PMC4599808; doi:10.1371/journal.pgen.1005571), 2015-10-09
Supplement: pgen.1005571.s003.pdf [file pgen.1005571.s003.pdf]

**S3 Table. Plasmids.**

| <b>Plasmid</b> | <b>Description</b>          | <b>Markers</b>  | <b>Source</b> |
|----------------|-----------------------------|-----------------|---------------|
| pBDG606        | pGTy1 <i>his3-AI</i>        | <i>URA3/CEN</i> | (1)           |
| pRS416         | Empty                       | <i>URA3/CEN</i> | (2)           |
| pGTy1-H3Cla    | pGTy1                       | <i>URA3/2μ</i>  | (3)           |
| pJEF1266       | pGTy1pr-1702Sacl            | <i>URA3/2μ</i>  | (4)           |
| pRS426         | Empty                       | <i>URA3/2μ</i>  | (5)           |
| pTy1-ATGfs     | Ty1-ATGfs                   | <i>URA3/2μ</i>  | (6)           |
| pBJM42         | pBDG606- <i>W814A</i>       | <i>URA3/CEN</i> | This study    |
| pBJM60         | pBDG606- <i>IM248-249NR</i> | <i>URA3/CEN</i> | This study    |
| pBJM43         | pBDG606- <i>L252R</i>       | <i>URA3/CEN</i> | This study    |
| pBJM61         | pBDG606- <i>LF339-340RD</i> | <i>URA3/CEN</i> | This study    |
| pBJM62         | pBDG606- <i>I343K</i>       | <i>URA3/CEN</i> | This study    |
| pBDG1534       | pGTy1 <i>his3-AI</i>        | <i>TRP1/CEN</i> | (7)           |
| pBJM24         | pBDG1534- <i>I201T</i>      | <i>TRP1/CEN</i> | This study    |
| pBJM93         | pGp22-V5                    | <i>URA3/CEN</i> | This study    |
| pRS414         | Empty                       | <i>TRP1/CEN</i> | (2)           |

|          |                         |                 |            |
|----------|-------------------------|-----------------|------------|
| pBDG1606 | pGTy1PR- <i>his3-AI</i> | <i>TRP1/CEN</i> | This study |
| pGTy917  | pGTy2-917               | <i>URA3/2μ</i>  | (8)        |
| pJC384   | Ty2-917                 | <i>URA3/2μ</i>  | (6)        |
| pBDG1565 | pGAL-Yes2:1038-1616     | <i>URA3/2μ</i>  | (7)        |
| pBDG101  | pGAL                    | <i>URA3/2μ</i>  | (9)        |
| pBDG1130 | pGPOLΔ                  | <i>URA3/2μ</i>  | (7)        |
| pBDG1375 | pYES2-p45               | <i>URA3/2μ</i>  | (10)       |
| pBDG1586 | pGPOLΔ <i>d1</i> (11)   | <i>URA3/2μ</i>  | This study |

---

### Supplemental References for Plasmids

1. Dakshinamurthy A, Nyswaner KM, Farabaugh PJ, Garfinkel DJ. BUD22 affects Ty1 retrotransposition and ribosome biogenesis in *Saccharomyces cerevisiae*. *Genetics*. 2010;185(4):1193-205.
2. Sikorski R, Hieter P. A system of shuttle vectors and yeast host strains designed for efficient manipulation of DNA in *Saccharomyces cerevisiae*. *Genetics*. 1989;122:19-27.
3. Garfinkel D, Mastrangelo M, Sanders N, Shafer B, Strathern J. Transposon tagging using Ty elements in yeast. *Genetics*. 1988;120(1):95-108.
4. Youngren SD, Boeke JD, Sanders NJ, Garfinkel DJ. Functional organization of the retrotransposon Ty from *Saccharomyces cerevisiae*: Ty protease is required for transposition. *Molecular and cellular biology*. 1988;8(4):1421-31.
5. Christianson TW, Sikorski RS, Dante M, Shero JH, Hieter P. Multifunctional yeast high-copy-number shuttle vectors. *Gene*. 1992;110(1):119-22.
6. Garfinkel DJ, Nyswaner K, Wang J, Cho J-Y. Post-transcriptional cosuppression of Ty1 retrotransposition. *Genetics*. 2003;165(1):83-99.
7. Saha A, Mitchell JA, Nishida Y, Hildreth JE, Ariberre JA, Gilbert WV, et al. A trans-Dominant Form of Gag Restricts Ty1 Retrotransposition and Mediates Copy Number Control. *J Virol*. 2015;89(7):3922-38.
8. Garfinkel DJ, Mastrangelo MF, Sanders NJ, Shafer BK, Strathern JN. Transposon tagging using Ty elements in yeast. *Genetics*. 1988;120(1):95-108.
9. Curcio MJ, Sanders NJ, Garfinkel DJ. Transpositional competence and transcription of endogenous Ty elements in *Saccharomyces cerevisiae*: implications for regulation of transposition. *Molecular and cellular biology*. 1988;8(9):3571-81.

10. Nishida Y, Pachulska-Wieczorek, K., Błaszczyk, L., Saha, A., Gumna, J., Garfinkel, D.J., Purzycka, K.J. Ty1 retrovirus-like element Gag contains overlapping restriction factor and nucleic acid chaperone functions. *Nucleic Acids Res.* 2015:In press.
11. Merkulov GV, Swiderek KM, Brachmann CB, Boeke JD. A critical proteolytic cleavage site near the C terminus of the yeast retrotransposon Ty1 Gag protein. *J Virol.* 1996;70(8):5548-56.
