# Supplementary material for: The Ty1 Retrotransposon Restriction Factor p22 Targets Gag
Source: PubMed Central journal article supplement (PMC4599808; doi:10.1371/journal.pgen.1005571), 2015-10-09
Supplement: pgen.1005571.s004.pdf [file pgen.1005571.s004.pdf]

**S4 Table. CNC<sup>R</sup> pGTy1his3-AI mobility.**

| <b>Experiment</b> | <b>Ty1</b> | <b>pGTy1his3AI</b> | <b>pGTy1his3-AI mobility<br/>X 10<sup>-5</sup> (SD)</b> |
|-------------------|------------|--------------------|---------------------------------------------------------|
| <b>A</b>          | 1          | WT                 | 3500 (610)                                              |
|                   | 38         | WT                 | 1.8 (0.5)                                               |
|                   | 38         | Gag N183D          | 420 (70)                                                |
|                   | 38         | Gag A273V          | 440 (96)                                                |
|                   | 38         | Gag I201T          | 620 (110)                                               |
|                   | 38         | Gag K186Q          | 760 (120)                                               |
| <b>B</b>          | 1          | WT                 | 2100 (300)                                              |
|                   | 38         | WT                 | 3.1 (0.4)                                               |
|                   | 1          | Gag N183D          | 1900 (250)                                              |
|                   | 1          | Gag A273V          | 2200 (340)                                              |
|                   | 1          | Gag I201T          | 2100 (250)                                              |
|                   | 1          | Gag K186Q          | 2500 (530)                                              |
| <b>C</b>          | 1          | WT                 | 990 (320)                                               |
|                   | 38         | WT                 | 1.3 (0.3)                                               |
|                   | 38         | Gag P173L          | 85 (12)                                                 |

|          |    |                |            |
|----------|----|----------------|------------|
|          | 38 | Gag D180N      | 45 (8.6)   |
|          | 38 | Gag T218A      | 53 (12)    |
|          | 38 | Gag T218I      | 43 (12)    |
|          | 38 | Gag E287T      | 43 (16)    |
| <b>D</b> | 1  | WT             | 2300 (270) |
|          | 38 | WT             | 2 (0.3)    |
|          | 1  | Gag P173L      | 320 (90)   |
|          | 1  | Gag D180N      | 2700 (360) |
|          | 1  | Gag T218A      | 3100 (350) |
|          | 1  | Gag T218I      | 2700 (320) |
|          | 1  | Gag E287T      | 2700 (300) |
| <b>E</b> | 1  | WT             | 1900 (300) |
|          | 38 | WT             | 1.2 (0.3)  |
|          | 38 | Gag T55A Q351L | 22 (3.9)   |
|          | 38 | Gag K250E      | 14 (3.1)   |
| <b>F</b> | 1  | WT             | 1000 (270) |
|          | 38 | WT             | 1.5 (0.4)  |

|          |    |                 |            |
|----------|----|-----------------|------------|
|          | 1  | Gag T55A Q351L  | 1000 (170) |
|          | 1  | Gag K250E       | 5.6 (1.3)  |
| <b>G</b> | 1  | WT              | 1900 (370) |
|          | 38 | WT              | 1 (0.2)    |
|          | 38 | Gag V336I       | 13 (2.9)   |
|          | 38 | Gag Q350R S395L | 18 (2.7)   |
|          | 38 | Gag M174I R362G | 51 (17)    |
|          | 38 | Gag I189V S411G | 30 (8.8)   |
| <b>H</b> | 1  | WT              | 2200 (290) |
|          | 38 | WT              | 0.5 (0.1)  |
|          | 1  | Gag V336I       | 3200 (370) |
|          | 1  | Gag Q350R S395L | 1800 (350) |
|          | 1  | Gag M174I R362G | 1900 (150) |
|          | 1  | Gag I189V S411G | 2900 (520) |
| <b>I</b> | 1  | WT              | 1400 (200) |
|          | 38 | WT              | 1.8 (0.3)  |
|          | 1  | RT D518G/V519A  | 6.1 (1.1)  |

|   |    |                |            |
|---|----|----------------|------------|
|   | 38 | RT D518G/V519A | 20 (2.9)   |
| I | 1  | WT             | 2400 (330) |
|   | 38 | WT             | 1 (0.2)    |
|   | 1  | I201T/A273V    | 190 (19)   |
|   | 38 | I201T/A273V    | 85 (36)    |

---
