# Supplementary material for: The Ty1 Retrotransposon Restriction Factor p22 Targets Gag
Source: PubMed Central journal article supplement (PMC4599808; doi:10.1371/journal.pgen.1005571), 2015-10-09
Supplement: pgen.1005571.s005.pdf [file pgen.1005571.s005.pdf]

**S5 Table. Ty2-917his3-AI mobility.**

|          | <b>Vector</b><br><b>(multicopy, 2<math>\mu</math>)</b> | <b>Ty2-917his3-AI</b><br><b>mobility</b><br><b>x 10<sup>-6</sup> (SD)</b> | <b>Fold change</b> |
|----------|--------------------------------------------------------|---------------------------------------------------------------------------|--------------------|
| <b>A</b> | empty                                                  | 6.5 (1.0)                                                                 | 1                  |
|          | pGTy2-917                                              | 5.5 (1.6)                                                                 | ↓1.2               |
|          | Ty2-917                                                | 9.5 (1.5)                                                                 | ↑1.5               |
| <b>B</b> | empty                                                  | 9.0 (2.7)                                                                 | 1                  |
|          | p22                                                    | 4.9 (2.7)                                                                 | ↓1.8               |
