# Supplementary material for: The Ty1 Retrotransposon Restriction Factor p22 Targets Gag
Source: PubMed Central journal article supplement (PMC4599808; doi:10.1371/journal.pgen.1005571), 2015-10-09
Supplement: pgen.1005571.s006.pdf [file pgen.1005571.s006.pdf]

**S6 Table. PR/p4 is not required for CNC.**

| <b>Vector</b><br><b>(multicopy, 2<math>\mu</math>)</b> | <b>Ty1<i>his3-AI</i> mobility</b><br><b>x 10<sup>-6</sup> (SD)</b> | <b>Fold decrease</b> |
|--------------------------------------------------------|--------------------------------------------------------------------|----------------------|
| empty                                                  | 490 (140)                                                          | 1                    |
| pGPOL $\Delta$                                         | 3.3 (1.5)                                                          | 150                  |
| pGPOL $\Delta d1$                                      | 3.6 (0.5)                                                          | 140                  |
| pYES2-p45                                              | 3.0 (1.7)                                                          | 163                  |
